# Supplementary material for: Enantioselective Labeling of Zebrafish for D-Phenylalanine Based on Graphene-Based Nanoplatform
Source: MDPI journal article supplement (doi:10.3390/molecules28093700), 2023-04-25
Supplement: s1 [file s1]

# Enantioselective Labeling of Zebrafish for D-Phenylalanine Based on Graphene-Based Nanoplatfrom

*Supporting Information*

Yuqing He <sup>1,†</sup>, Ziqi Ye <sup>2,†</sup>, Fei Zhu <sup>3,†</sup>, Tianxiang Qiu <sup>1</sup>, Xiyan Dai <sup>1</sup>, Yue Xie <sup>1</sup>, Shibiao Zou <sup>1</sup>, Qingjian Dong <sup>4,\*</sup>, Weiyang Zhang <sup>2</sup>, Junkai Ma <sup>5</sup> and Xiaowei Mao <sup>1,\*</sup>

<sup>1</sup> Hubei Key Laboratory of Environmental and Health Effects of Persistent Toxic Substances, School of Environment and Health, Jiangnan University, Wuhan 430014, China

<sup>2</sup> Key Laboratory of Optoelectronic Chemical Materials and Devices of Ministry of Education, School of Life Science, Jiangnan University, Wuhan 430014, China

<sup>3</sup> Hubei Key Laboratory of Embryonic Stem Cell Research, School of Basic Medical Science, Hubei University of Medicine, Shiyan 442000, China

<sup>4</sup> Department of Nuclear Medicine, Tongji Hospital, Tongji Medical College, Huazhong University of Science and Technology, Wuhan 430074, China

<sup>5</sup> Hubei Key Laboratory of Wudang Local Chinese Medicine Research, Department of Chemistry, School of Pharmacy, Hubei University of Medicine, Shiyan 442000, China

\* Correspondence: dongqingjian@hust.edu.cn (Q.D); maowei5167@126.com (X.M.)

† These authors contributed equally to this work.

## Contents

|                                                                        |     |
|------------------------------------------------------------------------|-----|
| 1. TEM characterization of GO.....                                     | S9  |
| 2. The FT-IR and IR spectra of GO and $\gamma$ -CD-GO.....             | S10 |
| 3. XPS spectrum and elemental analysis of GO and $\gamma$ -CD-GO ..... | S11 |
| 4. The Gaussian calculation data.....                                  | S12 |
| 5. Cytotoxic of $\gamma$ -CD-GO .....                                  | S13 |
| 6. Chiral imaging of $\gamma$ -CD-GO in Hela cells.....                | S14 |
| 7. Chiral imaging of $\gamma$ -CD-GO in zebra fish .....               | S15 |

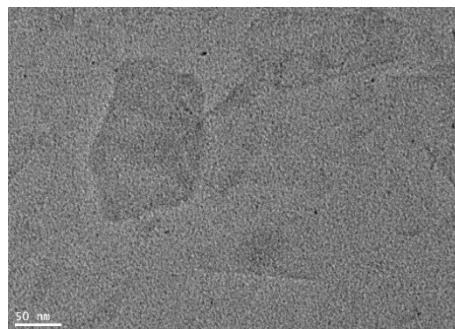

Figure S1. TEM images of GO.

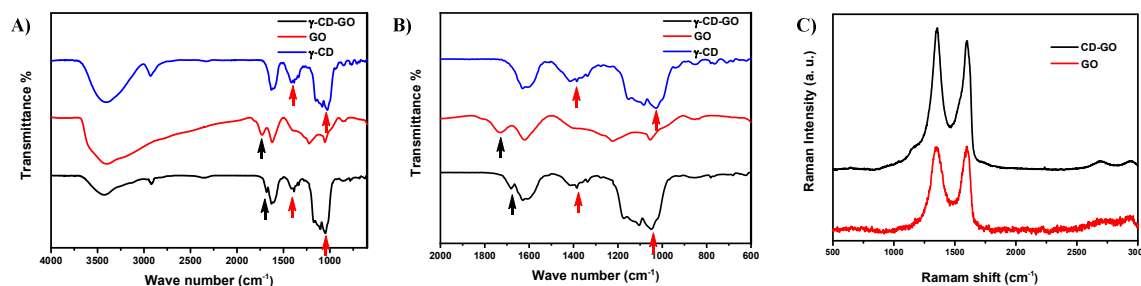

Figure S2. A) FT-IR spectra of pure  $\gamma$ -CD, GO, and  $\gamma$ -CD-GO, respectively; B) The amplification of FT-IR spectra; C) Raman spectra showing the D and G bands of GO and  $\gamma$ -CD-GO, respectively.

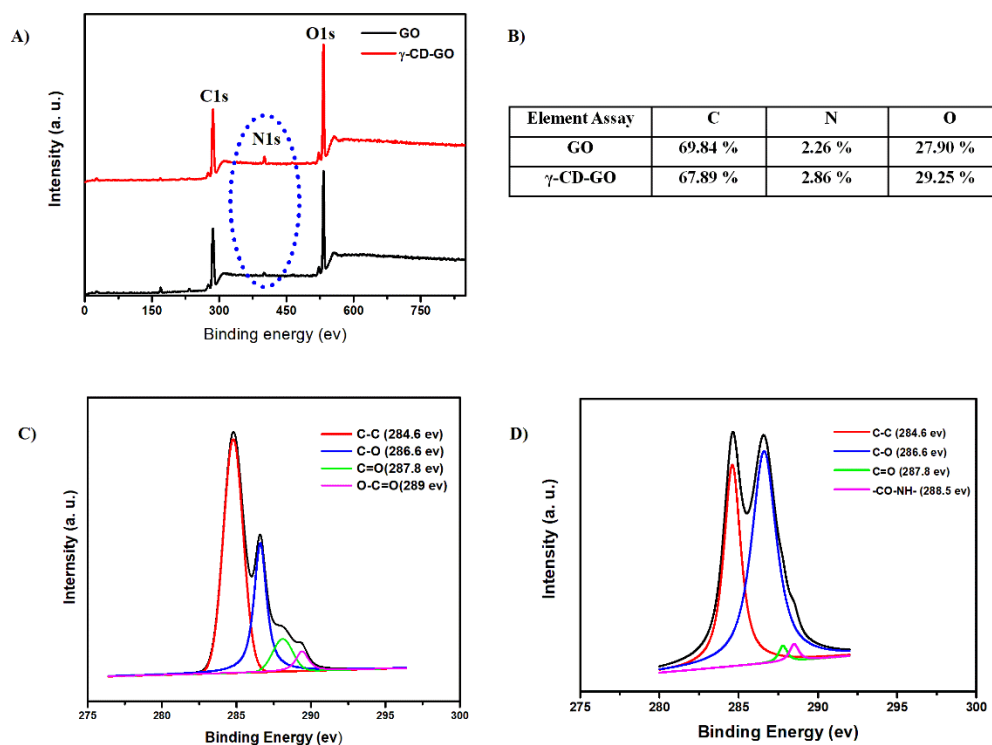

Figure S3. A) XPS spectrum of GO and  $\gamma$ -CD-GO; B) Element content analysis of GO and  $\gamma$ -CD-GO; XPS C1s spectrum of C) GO; D)  $\gamma$ -CD-GO, respectively.

**Table S1.** Thermodynamic parameters for the interaction of  $\gamma$ -CD with D/L-Phe-F by molecular simulation calculated at b3lyp/6-31G(d) levels using the Gaussian 03[1] package.

|                       | Energy (a. u.) | $\Delta$ Energy (a. u.) | $\Delta$ Energy (kcal/mol) | $\Delta$ Energy (kJ/mol) |
|-----------------------|----------------|-------------------------|----------------------------|--------------------------|
| $\gamma$ -CD          | -4858.55134324 |                         |                            |                          |
| F-D-Phe               | -1613.83970198 |                         |                            |                          |
| F-L-Phe               | -1613.84608168 |                         |                            |                          |
| F-D-Phe+ $\gamma$ -CD | -6472.40242796 | -0.01138274             | -7.14                      | -29.89                   |
| F-L-Phe+ $\gamma$ -CD | -6472.40402960 | -0.00660468             | -4.14                      | -17.34                   |

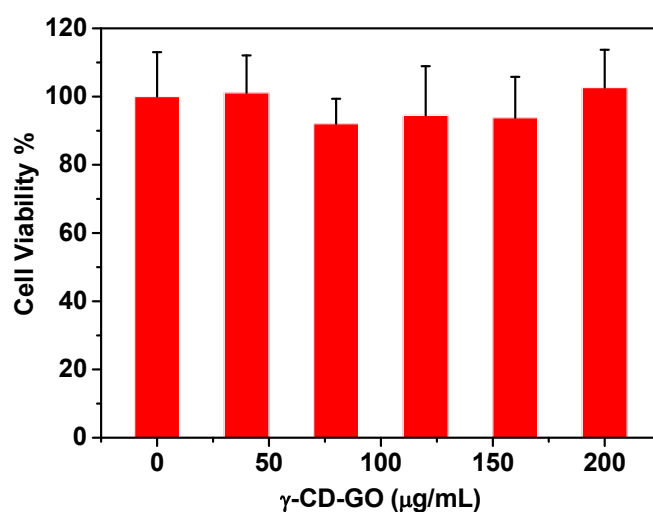**Figure S4.** Relative cell viability of HeLa treated with  $\gamma$ -CD-GO in different concentrations for 24 h in fresh medium.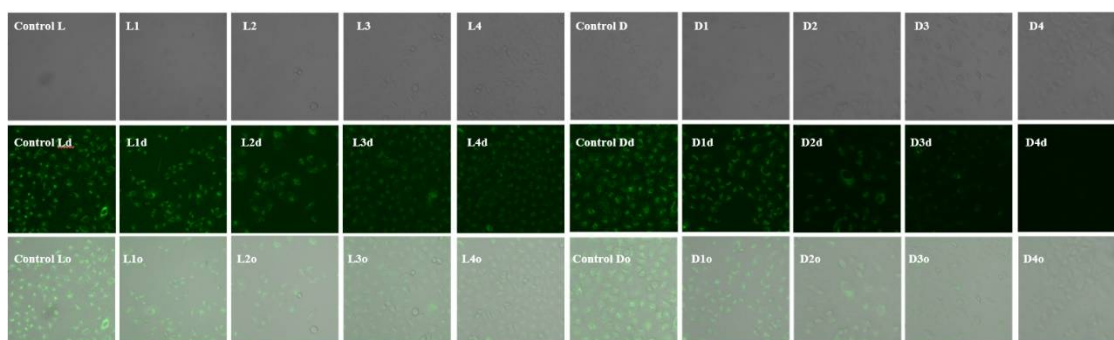**Figure S5.** Confocal fluorescence microscopy images of HeLa cells incubated with F-D/L-Phe (control L and D), or first incubated with F-D/L-Phe, then incubated with  $\beta$ -CD-GO in the concentration of 0.25  $\mu\text{g/mL}$  (L1 and D1), 0.50  $\mu\text{g/mL}$  (L2 and D2), 0.75  $\mu\text{g/mL}$  (L3 and D3), and 1.00  $\mu\text{g/mL}$  (L3 and D3) in sequence, and the images were obtained after extensive washing of cells with PBS for three times. Bright-field (top), dark-field fluorescence (middle), and overlap of images of dark and bright field (bottom), respectively.

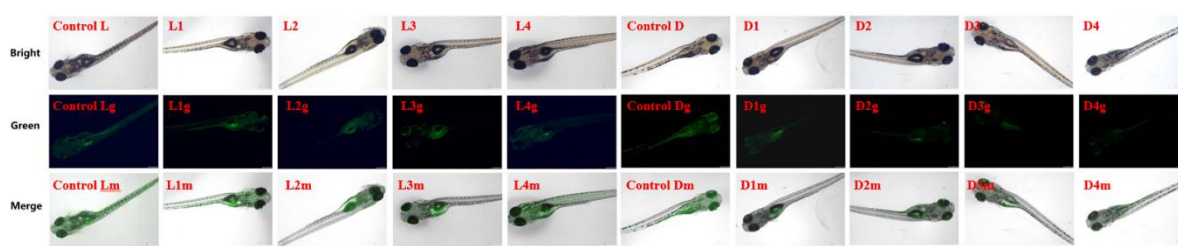

**Figure S6.** Fluorescence microscopy images of zebra fish incubated with F-D/L-Phe (control L and D), or first incubated with F-D/L-Phe, then incubated with  $\beta$ -CD-GO in the concentration of 0.25  $\mu\text{g/mL}$  (L1 and D1), 0.50  $\mu\text{g/mL}$  (L2 and D2), 0.75  $\mu\text{g/mL}$  (L3 and D3), and 1.00  $\mu\text{g/mL}$  (L3 and D3) in sequence, and the images were obtained after extensive washing of cells with PBS for three times. Bright-field (top), dark-field fluorescence (middle), and overlap of images of dark and bright field (bottom), respectively.
